# Supplementary material for: Aeromonas hydrophila CobQ is a new type of NAD+- and Zn2+-independent protein lysine deacetylase
Source: eLife journal article supplement (doi:10.7554/elife.97511), 2024-05-28
Supplement: fig1-data1 [file elife-97511-fig1-data1-v1.zip]

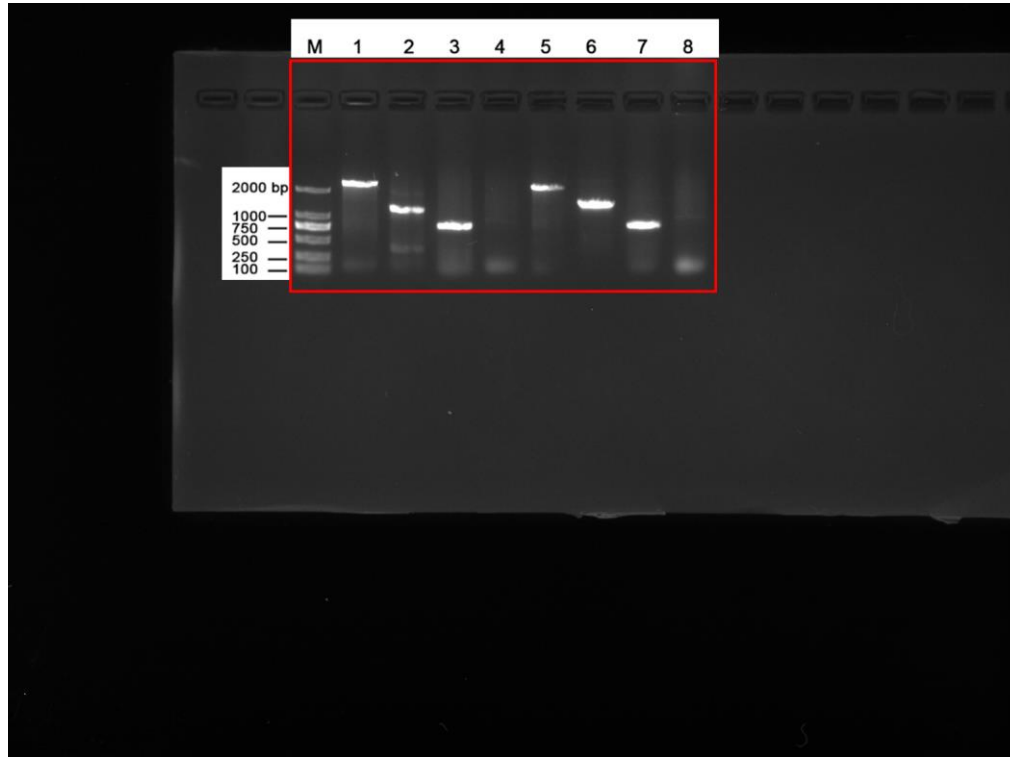

**Figure 1, Source Data 1.** Original PCR for Figure 3D. Construction of *ahcobB*- and *ahcobQ*-defective strains. M: Marker; Lanes 1 and 3: PCR products of WT using the P7/P8 primer pairs of *ahcobB* and *ahcobQ*, respectively; Lanes 2 and 6: PCR products of  $\Delta$ *ahcobB* and  $\Delta$ *ahcobQ*, respectively, using P7/P8 primer pairs; Lanes 5 and 7: PCR products of WT using P5/P6 primer pairs of *ahcobB* and *ahcobQ*, respectively; Lanes 4 and 8: PCR products of  $\Delta$ *ahcobB* and  $\Delta$ *ahcobQ*, respectively, using the P5/P6 primer pairs.
