# Supplementary material for: Aeromonas hydrophila CobQ is a new type of NAD+- and Zn2+-independent protein lysine deacetylase
Source: eLife journal article supplement (doi:10.7554/elife.97511), 2024-05-28
Supplement: fig2-data1 [file elife-97511-fig2-data1-v1.zip]

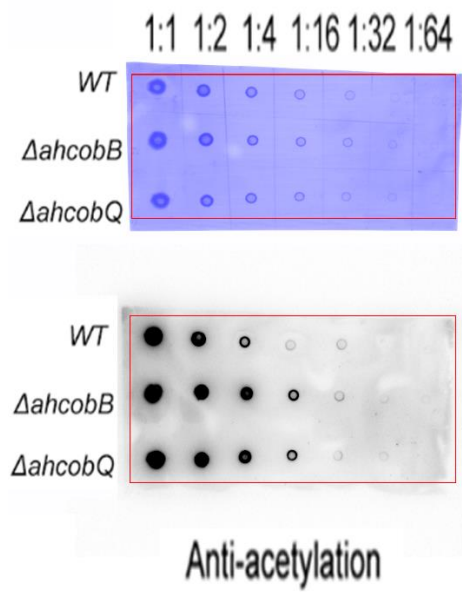

A

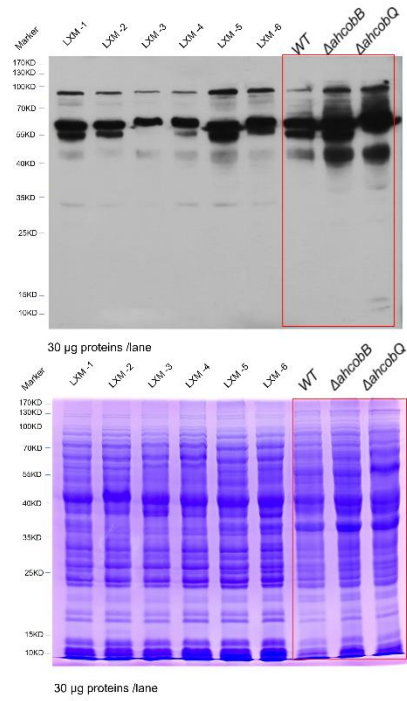

B

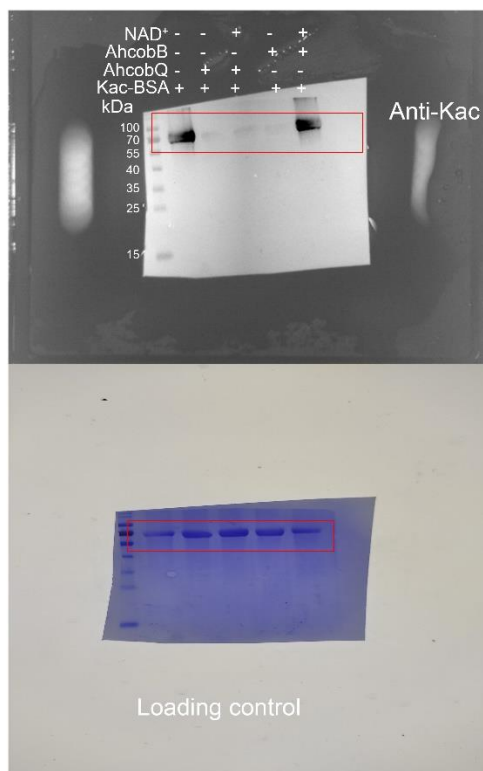

C

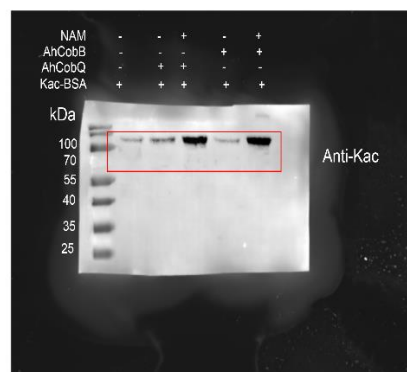

D

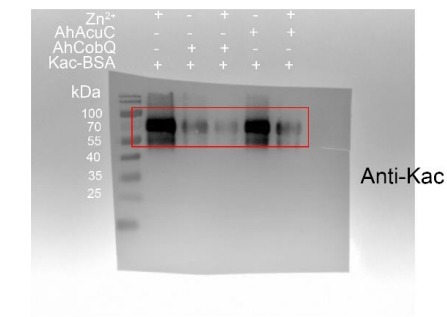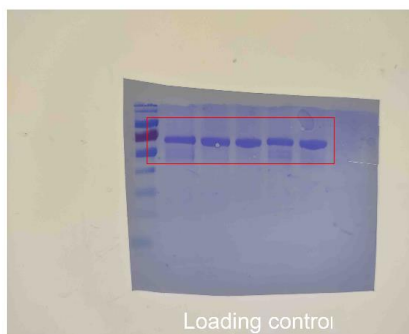

E

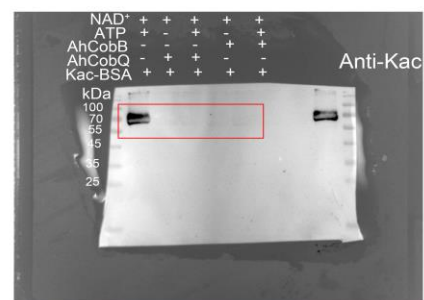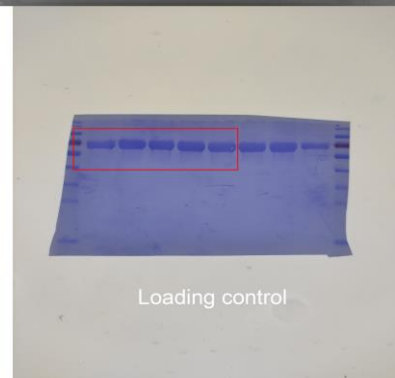

F

**Figure 2—source data 1.** Original files for western blot analysis displayed in Figure 2C-H. (A) and (B) Dot blot and western blot verified the whole cell protein Kac level among WT, *ΔahcobB*, and *ΔahcobQ* strains. (C–F) Effect of NAD<sup>+</sup>, NAM, Zn<sup>2+</sup>, and ATP on KDAC enzymatic activity of AhCobQ.
