# Supplementary material for: Aeromonas hydrophila CobQ is a new type of NAD+- and Zn2+-independent protein lysine deacetylase
Source: eLife journal article supplement (doi:10.7554/elife.97511), 2024-05-28
Supplement: fig2-figsupp2-data1 [file elife-97511-fig2-figsupp2-data1-v1.zip]

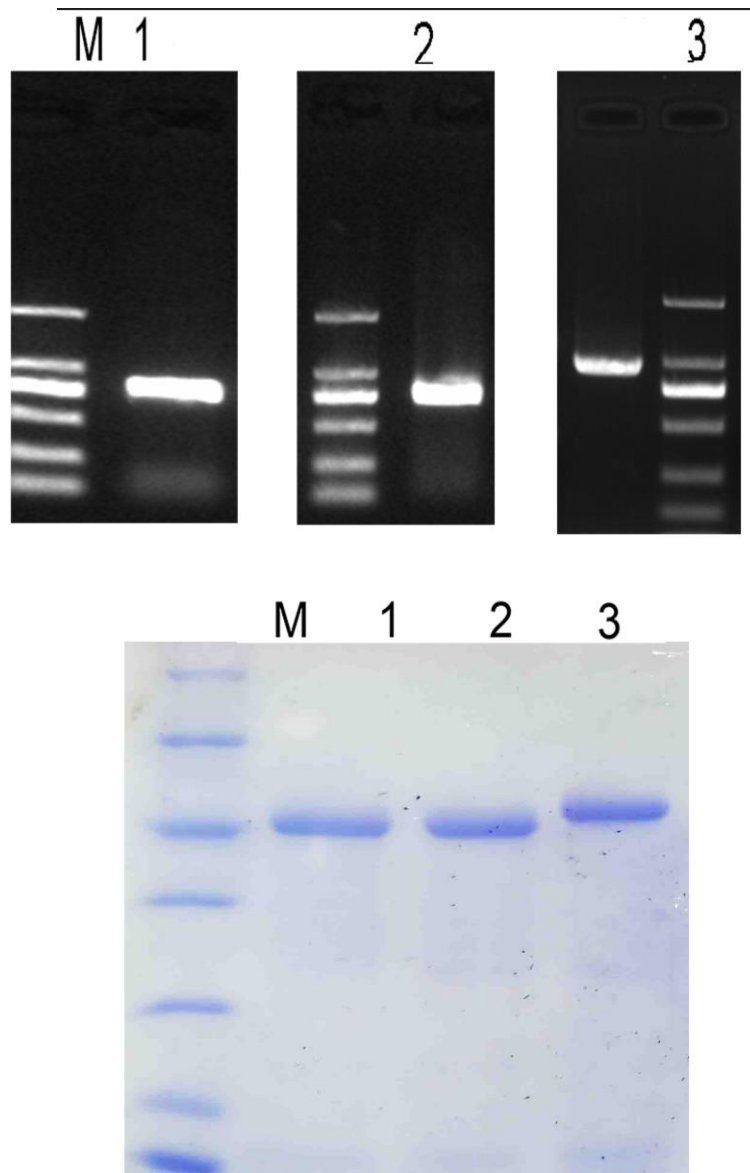

**Figure 2—figure supplement 2—source data 1.** Original files for western blot analysis displayed in Figure 2—figure supplement 2. Characteristics of overexpressed and purified recombinant proteins AhCobQ, AhCobB, and AhAcuC. PCR amplification results of *ahcobQ*, *ahcobB*, and *ahacuC* gene, respectively; SDS-PAGE gels of purified recombinant proteins AhCobQ, AhCobB, and AhAcuC, respectively. Lane M represents the DNA or protein marker. M: Marker; Lane 1: AhCobQ; Lane 2: AhCobB; Lane 3: AhAcuC.
