# Supplementary material for: Aeromonas hydrophila CobQ is a new type of NAD+- and Zn2+-independent protein lysine deacetylase
Source: eLife journal article supplement (doi:10.7554/elife.97511), 2024-05-28
Supplement: fig2-figsupp4-data1 [file elife-97511-fig2-figsupp4-data1-v1.zip]

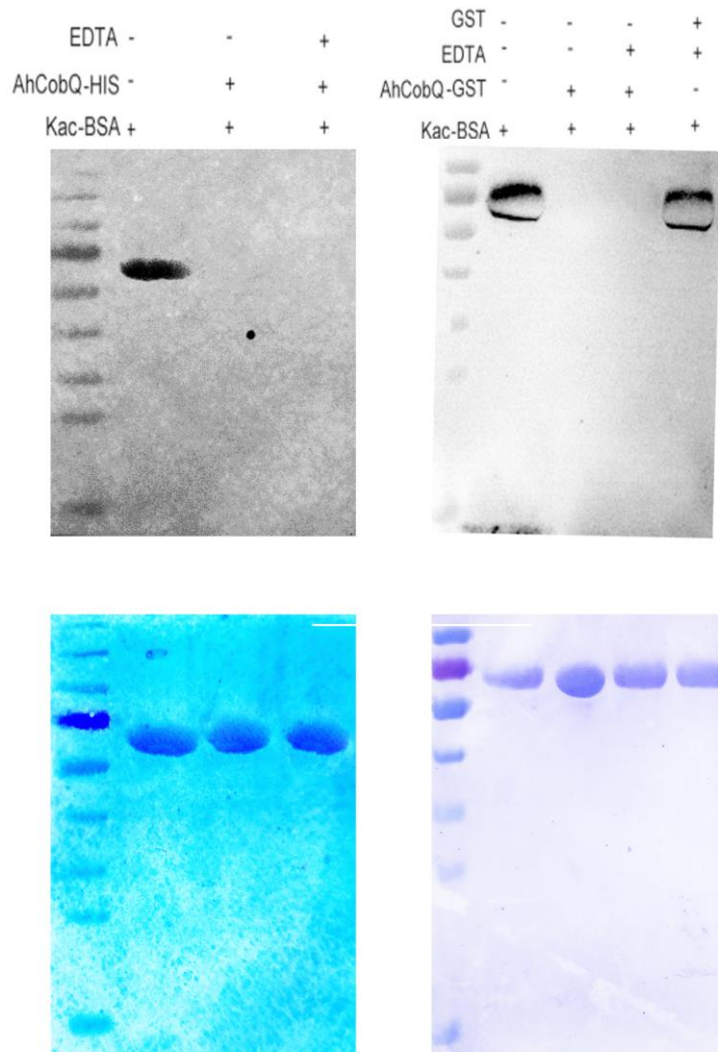

**Figure 2—figure supplement 4—source data 1.** Original files for western blot analysis displayed in Figure 2—figure supplement 4. In vitro deacetylase activity assay of different recombinant AhCobQ proteins in the presence and absence of EDTA utilizing Kac-BSA as substrate. Purified His-tag and GST-fused recombinant AhCobQ incubated with the substrate Kac-BSA, both in the absence and presence of 150  $\mu$ M EDTA treatment, respectively.
