# Supplementary material for: Aeromonas hydrophila CobQ is a new type of NAD+- and Zn2+-independent protein lysine deacetylase
Source: eLife journal article supplement (doi:10.7554/elife.97511), 2024-05-28
Supplement: fig2-figsupp5-data1 [file elife-97511-fig2-figsupp5-data1-v1.zip]

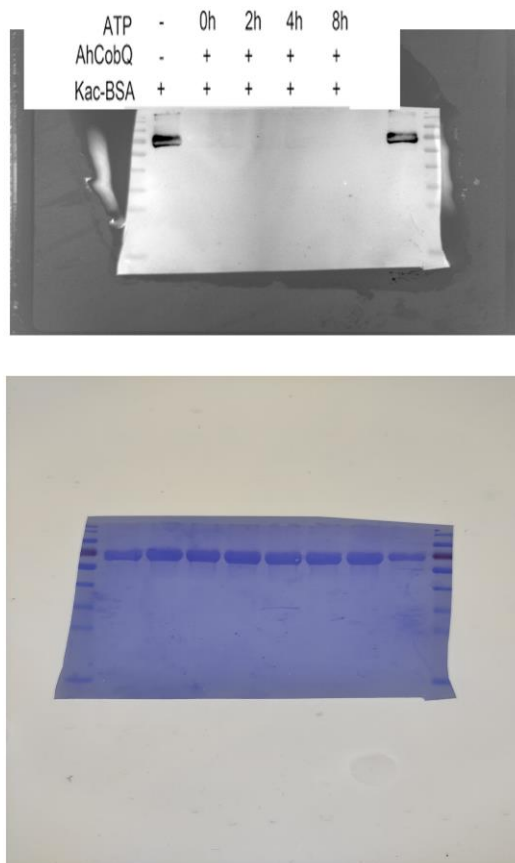

**Figure 2—figure supplement 5—source data 1.** Original files for western blot analysis displayed in Figure 2—figure supplement 5. The lysine deacetylase activity of AhCobQ didn't be affected by 0.5mM ATP at different incubation times.
