# Supplementary material for: Aeromonas hydrophila CobQ is a new type of NAD+- and Zn2+-independent protein lysine deacetylase
Source: eLife journal article supplement (doi:10.7554/elife.97511), 2024-05-28
Supplement: fig4-data1 [file elife-97511-fig4-data1-v1.zip]

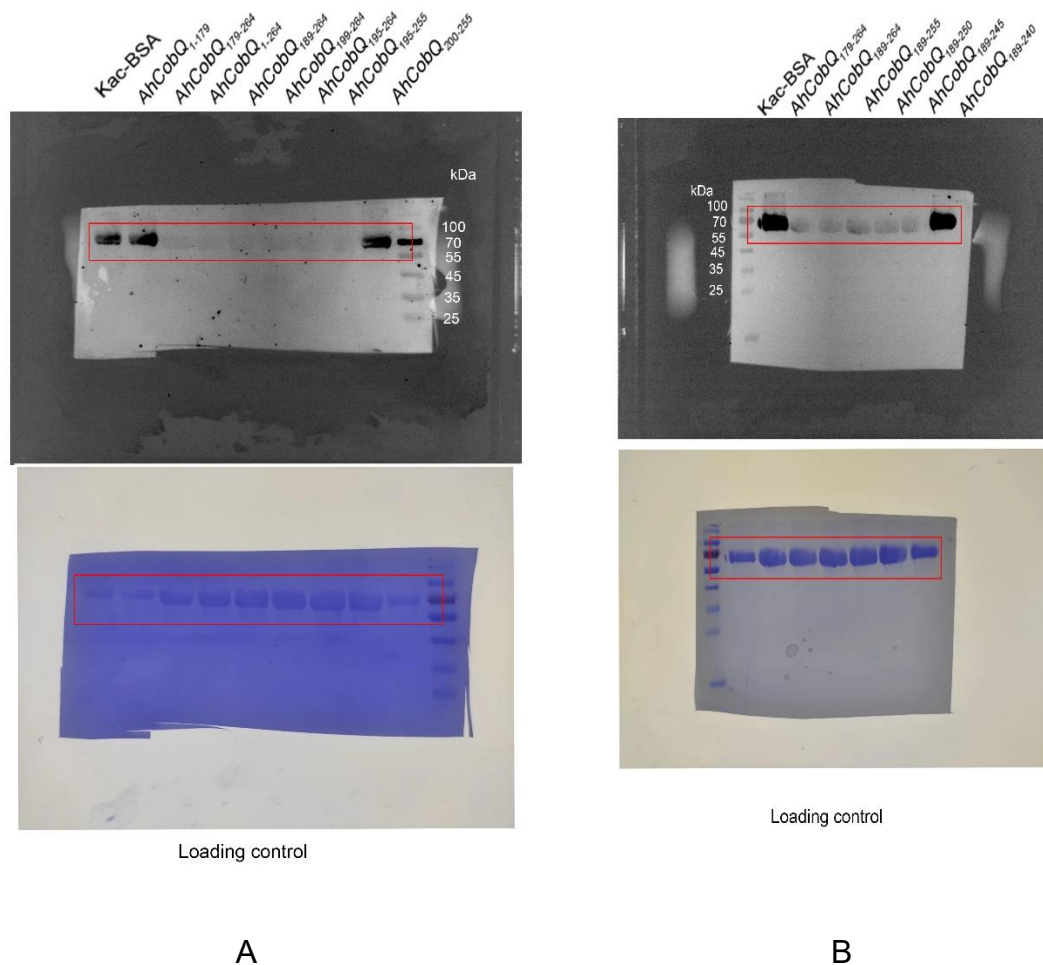

**Figure 4—source data 1.** Original files for western blot analysis displayed in Figure 4A, C. Western blot analysis of the KDAC activity of (A) AhCobQ<sub>1-179</sub>, AhCobQ<sub>179-264</sub>, AhCobQ<sub>1-264</sub>, AhCobQ<sub>189-264</sub>, AhCobQ<sub>199-264</sub>, AhCobQ<sub>195-264</sub>, AhCobQ<sub>195-255</sub>, and AhCobQ<sub>200-255</sub>; (B) AhCobQ<sub>179-264</sub>, AhCobQ<sub>189-264</sub>, AhCobQ<sub>189-255</sub>, AhCobQ<sub>189-250</sub>, AhCobQ<sub>189-245</sub>, and AhCobQ<sub>189-240</sub> truncated proteins treated with Kac-BSA. The first lane represents Kac-BSA without AhCobQ truncated proteins. The upper part of the figure shows the WB results of the Kac level of truncated proteins with Kac-BSA, and the lower part shows the PVDF membrane R350 staining for the loading amount control.
