# Supplementary material for: Aeromonas hydrophila CobQ is a new type of NAD+- and Zn2+-independent protein lysine deacetylase
Source: eLife journal article supplement (doi:10.7554/elife.97511), 2024-05-28
Supplement: fig4-figsupp1-data1 [file elife-97511-fig4-figsupp1-data1-v1.zip]

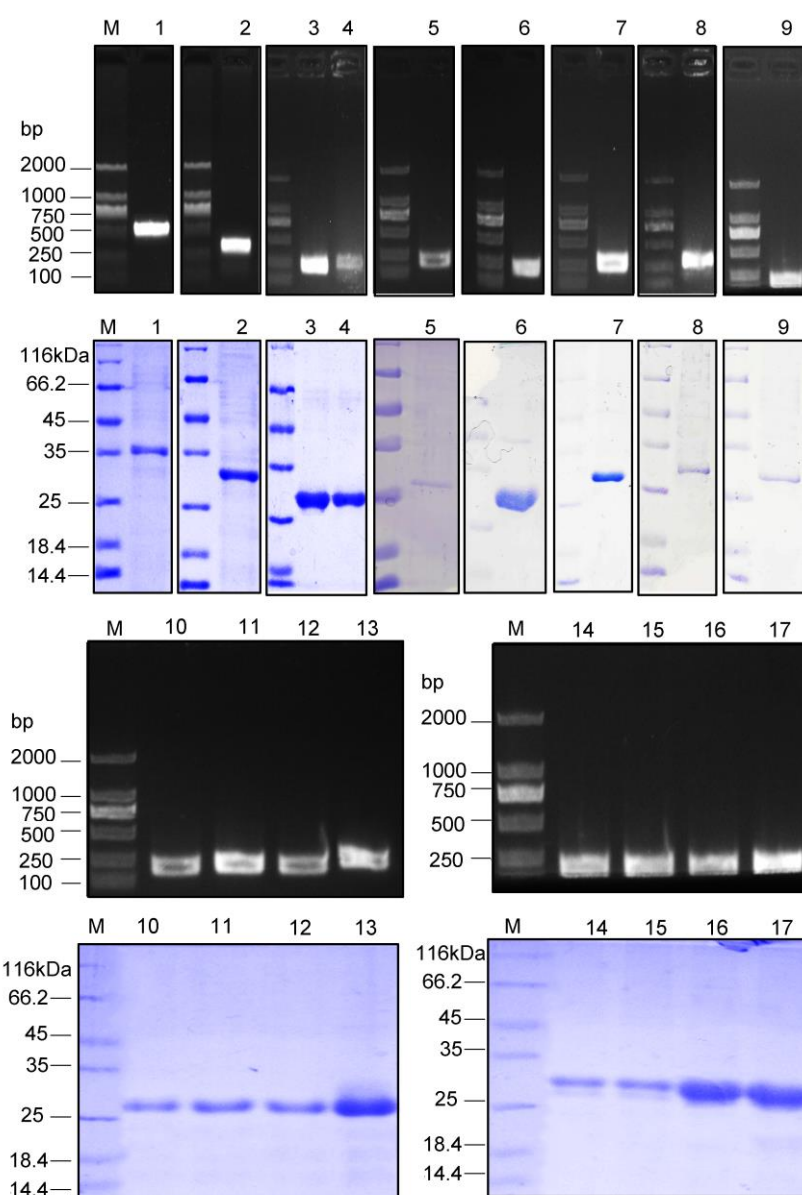

**Figure 4—figure supplement 1—source data 1.** Original files for PCR and SDS-PAGE analysis displayed in Figure 4—figure supplement 1. Characteristics of overexpressed and purified recombinant AhCobQ truncated proteins. The PCR amplification and SDS-PAGE results of purified recombinant truncated proteins (GST-fusion) 1: AhCobQ<sub>1–179</sub>; 2: AhCobQ<sub>179–265</sub>; 3: AhCobQ<sub>189–265</sub>; 4: AhCobQ<sub>189–255</sub>; 5: AhCobQ<sub>189–250</sub>; 6: AhCobQ<sub>189–245</sub>; 7: AhCobQ<sub>189–240</sub>; 8: AhCobQ<sub>195–255</sub>; 9: AhCobQ<sub>200–255</sub>; 10: AhCobQ<sub>179–225</sub>; 11: AhCobQ<sub>179–235</sub>; 12: AhCobQ<sub>179–245</sub>; 13: AhCobQ<sub>179–255</sub>; 14: AhCobQ<sub>189–265</sub>; 15: AhCobQ<sub>199–265</sub>; 16: AhCobQ<sub>209–265</sub>; 17: AhCobQ<sub>219–265</sub>.
