# Supplementary material for: Aeromonas hydrophila CobQ is a new type of NAD+- and Zn2+-independent protein lysine deacetylase
Source: eLife journal article supplement (doi:10.7554/elife.97511), 2024-05-28
Supplement: fig6-figsupp1-data1 [file elife-97511-fig6-figsupp1-data1-v1.zip]

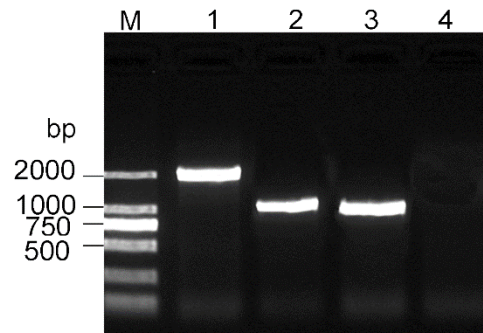

**Figure 6—figure supplement 1—source data 1.** Original files for PCR analysis displayed in Figure 6—figure supplement 1. Construction of *A. hydrophila ahacuC* knockout mutant strain M: Marker; Lanes 1 and 2: PCR products of WT and  $\Delta ahacuC$  using the P7/P8 primer pairs; Lanes 3 and 4: PCR products of WT and  $\Delta ahacuC$  using the P5/P6 primer pairs.
