# Supplementary material for: Aeromonas hydrophila CobQ is a new type of NAD+- and Zn2+-independent protein lysine deacetylase
Source: eLife journal article supplement (doi:10.7554/elife.97511), 2024-05-28
Supplement: fig7-data1 [file elife-97511-fig7-data1-v1.zip]

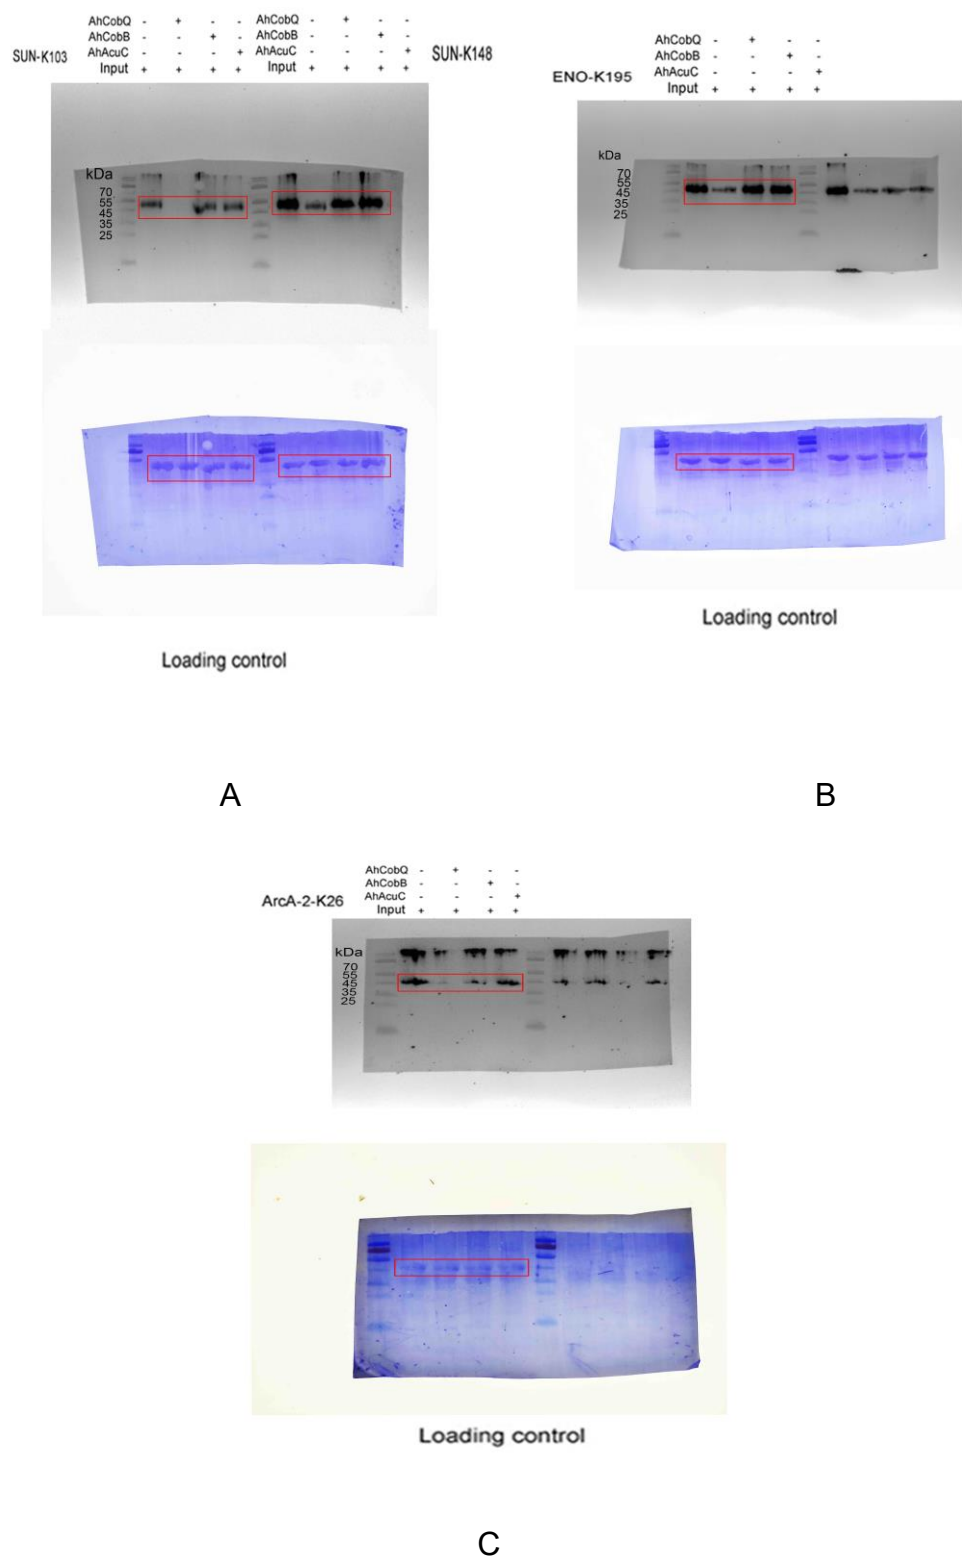

**Figure 7—source data 1.** Original files for western blot analysis displayed in Figure 7. Western blot validation of the site-specific Kac protein substrates regulated by the three KDACs.
