# Supplementary material for: Aeromonas hydrophila CobQ is a new type of NAD+- and Zn2+-independent protein lysine deacetylase
Source: eLife journal article supplement (doi:10.7554/elife.97511), 2024-05-28
Supplement: fig7-figsupp1-data1 [file elife-97511-fig7-figsupp1-data1-v1.zip]

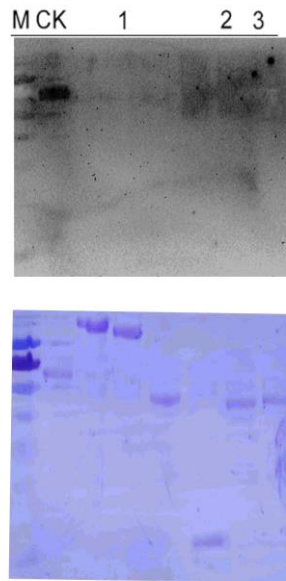

**Figure 7—figure supplement 1—source data 1.** Original files for western blot analysis displayed in Figure 7—figure supplement 1. Purified original recombinant proteins (without site-directed acetylation modification) without Kac modifications, validated by Western blot. 1: SUN, 2: ENO, 3 ArcA-2, CK: Kac-BSA, M: prestained protein marker. CK is Kac-BSA as a positive control. The lower section presents the PVDF membrane R350 staining for the loading amount control.
