# Supplementary material for: Aeromonas hydrophila CobQ is a new type of NAD+- and Zn2+-independent protein lysine deacetylase
Source: eLife journal article supplement (doi:10.7554/elife.97511), 2024-05-28
Supplement: fig7-figsupp2-data1 [file elife-97511-fig7-figsupp2-data1-v1.zip]

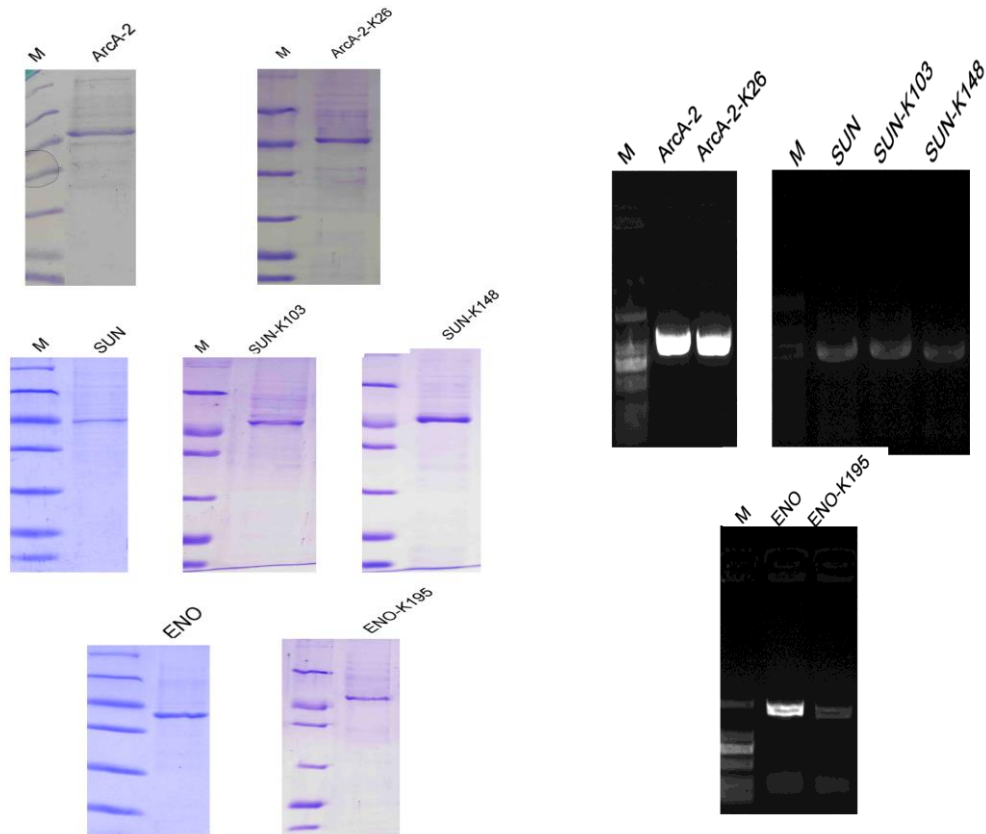

**Figure 7—figure supplement 2—source data 1.** Original files for PCR and SDS-PAGE analysis displayed in Figure 7—figure supplement 2. Characteristics of the overexpressed and purified recombinant target proteins. The PCR products (right) and SDS-PAGE results of the target recombinant or site-directed acetylated proteins. ArcA-2 and ArcA-2-K26; SUN, SUN-K103, and SUN-K148; ENO and ENO-K195.
