# Supplementary figures and images for: Aeromonas hydrophila CobQ is a new type of NAD+- and Zn2+-independent protein lysine deacetylase
Source: eLife journal article supplement (doi:10.7554/elife.97511), 2024-05-28

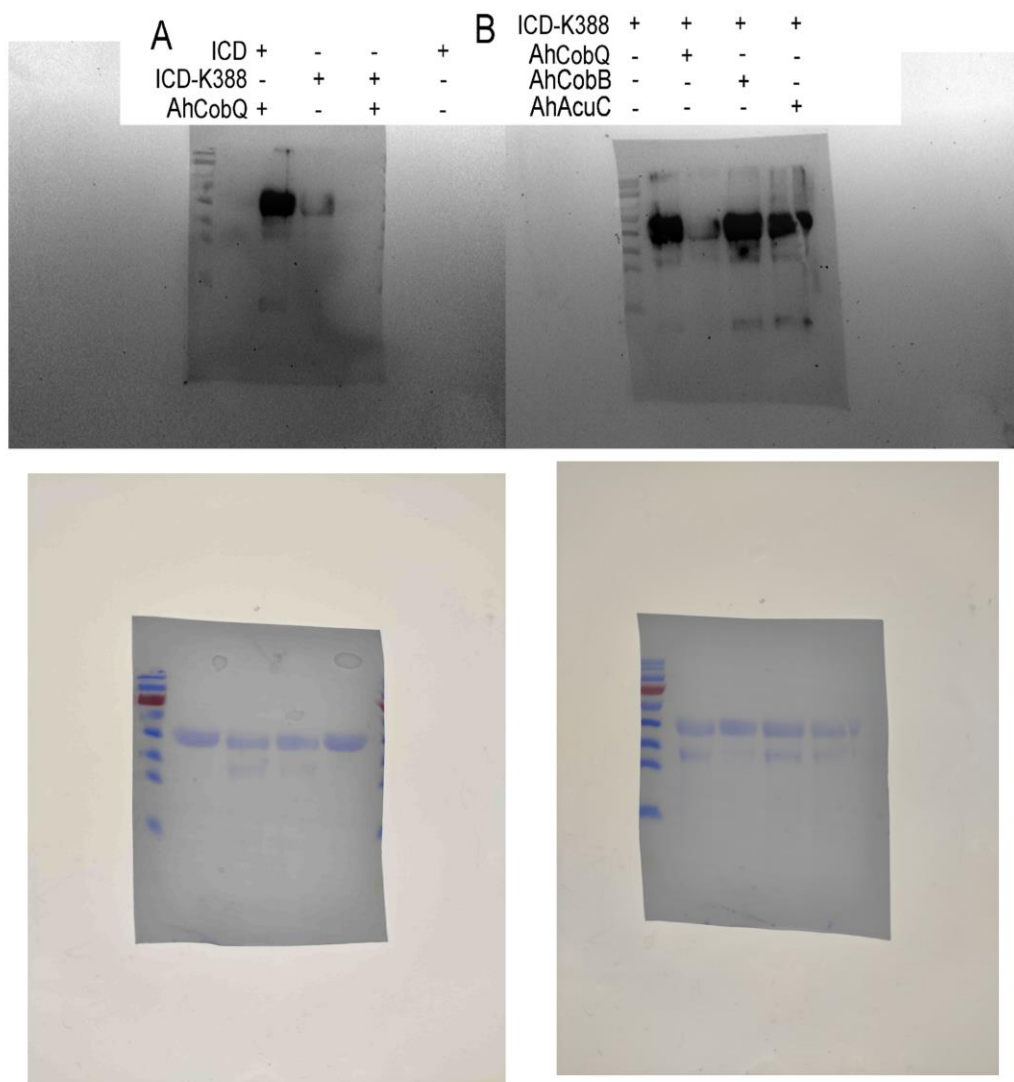

Supplement: fig8-data1 [file elife-97511-fig8-data1-v1.zip]
